# Supplementary material for: Interventions in sports settings to reduce risky alcohol consumption and alcohol-related harm: a systematic review
Source: PubMed Central journal article supplement (PMC4721008; doi:10.1186/s13643-016-0183-y), 2016-01-21

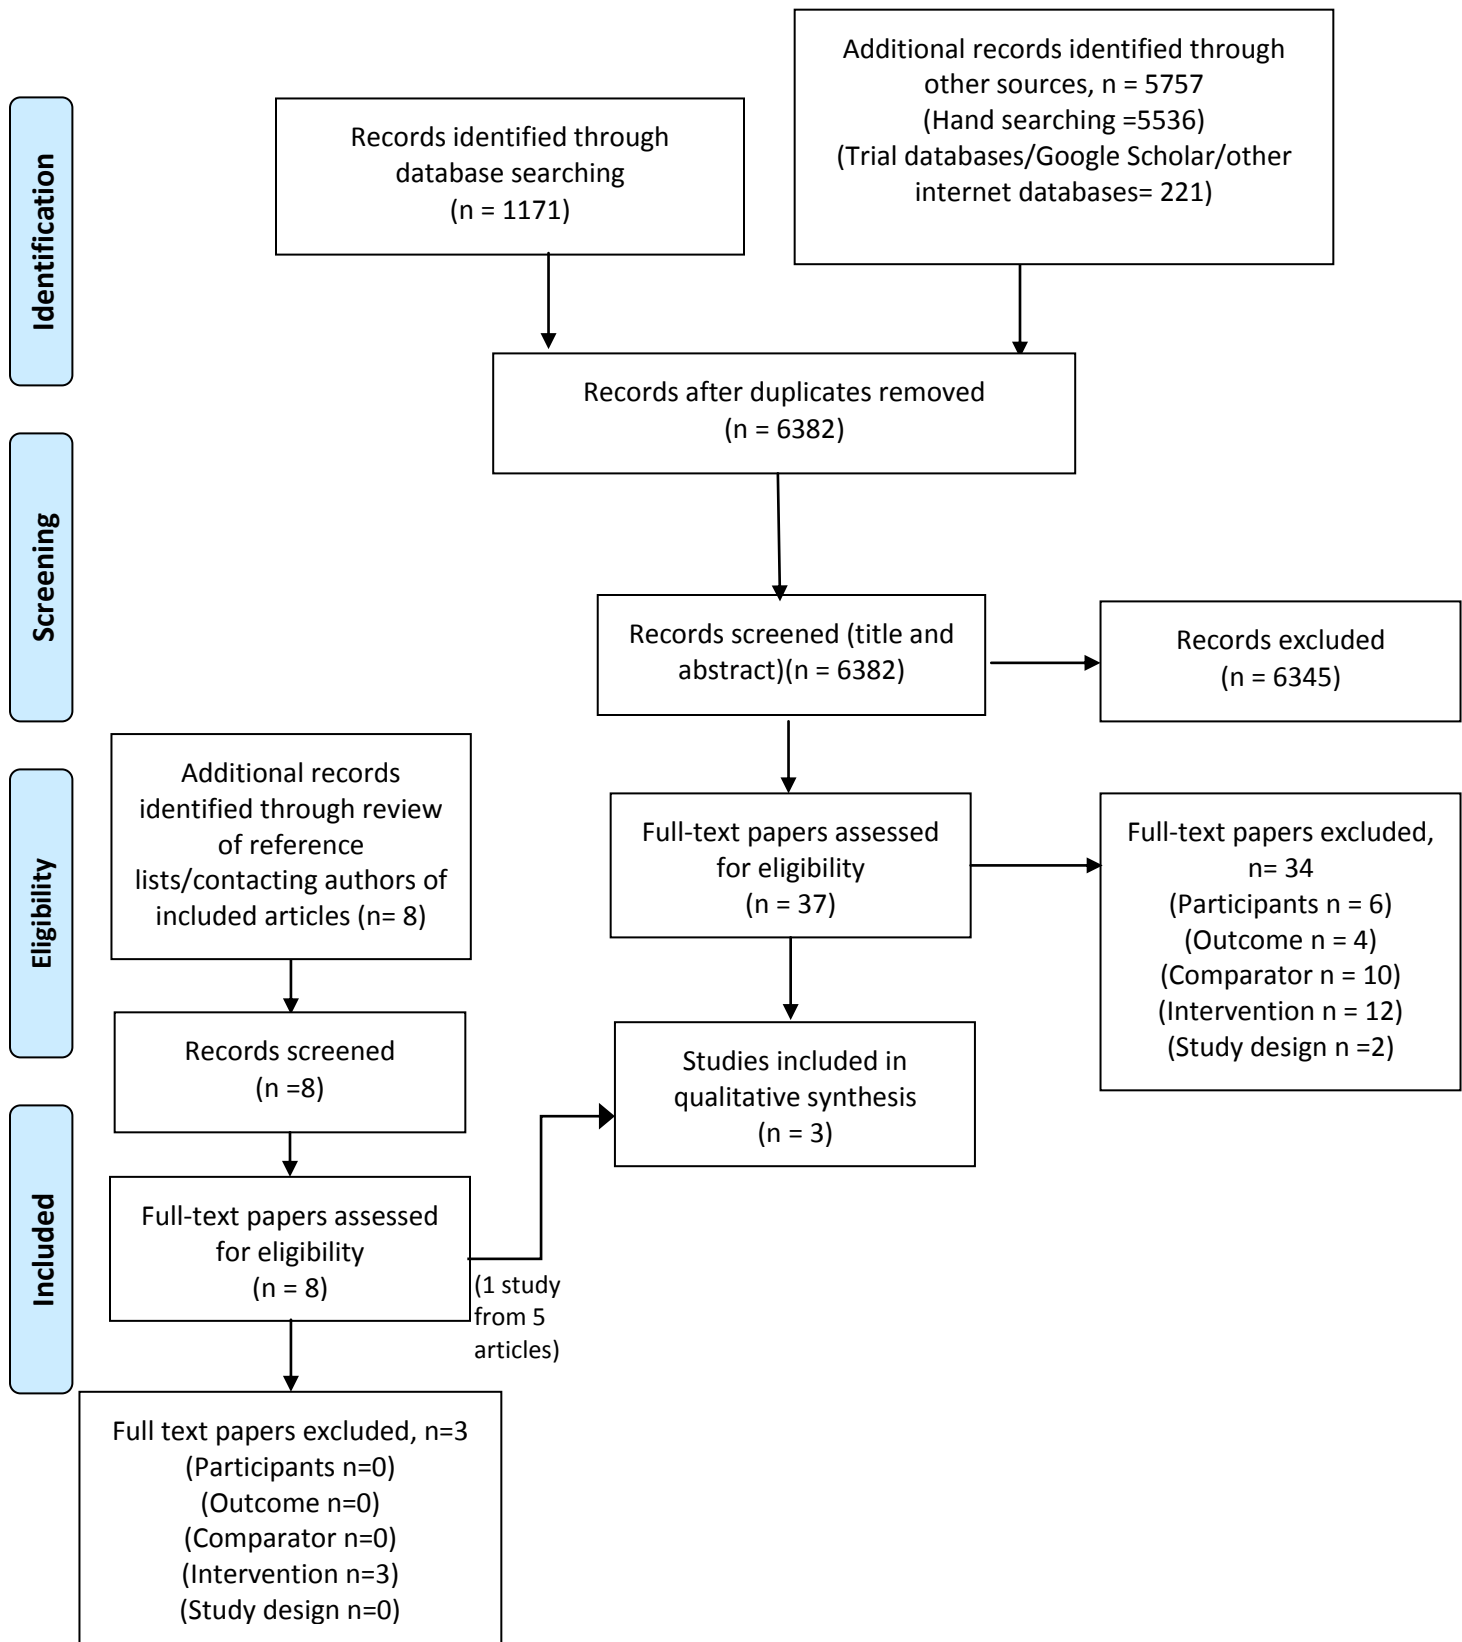

Supplement: 13643_2016_183_MOESM2_ESM.pdf [file 13643_2016_183_MOESM2_ESM.pdf]
